# Supplementary material for: Knockdown of Indy/CeNac2 extends Caenorhabditis elegans life span by inducing AMPK/aak-2
Source: publisher site journal article supplement (doi:10.18632/aging.100791), 2015-08-20
Supplement: Supplementary file [file aging-v7i8-100791-supplementary-material-SD1.pdf]

## SUPPLEMENTAL DATA

**Table S1. Mean life spans in four independent experiments.**

| Strain                        | mean | ± SEM  | n  | p-value<br>$\chi^2$ | N2<br>INDY/<br>CeNAC2 | / | TG38<br>INDY/<br>CeNAC2 | / | CB1370<br>/ empty<br>vector<br>control |
|-------------------------------|------|--------|----|---------------------|-----------------------|---|-------------------------|---|----------------------------------------|
| N2 / empty vector control     | 16.4 | ± 0.28 | 60 |                     | 0.027                 |   |                         |   | ≤0.001                                 |
| N2 / INDY/CeNAC2              | 17.2 | ± 0.36 | 60 |                     |                       |   |                         |   | ≤0.001                                 |
| TG38 / empty vector control   | 13.5 | ± 0.26 | 60 |                     |                       |   | ≤0.001                  |   | ≤0.001                                 |
| TG38 / INDY/CeNAC2            | 14.2 | ± 0.29 | 60 |                     |                       |   |                         |   | ≤0.001                                 |
| CB1370 / empty vector control | 28.1 | ± 1.32 | 60 |                     |                       |   |                         |   |                                        |

| Strain                        | mean | ± SEM  | n  | p-value<br>$\chi^2$ | N2<br>INDY/<br>CeNAC2 | / | TG38<br>INDY/<br>CeNAC2 | / | CB1370<br>/ empty<br>vector<br>control |
|-------------------------------|------|--------|----|---------------------|-----------------------|---|-------------------------|---|----------------------------------------|
| N2 / empty vector control     | 15.8 | ± 0.29 | 60 |                     | ≤0.001                |   |                         |   | ≤0.001                                 |
| N2 / INDY/CeNAC2              | 19.3 | ± 0.52 | 60 |                     |                       |   |                         |   | ≤0.001                                 |
| TG38 / empty vector control   | 14.1 | ± 0.21 | 60 |                     |                       |   | ≤0.001                  |   | ≤0.001                                 |
| TG38 / INDY/CeNAC2            | 14.7 | ± 0.26 | 60 |                     |                       |   |                         |   | ≤0.001                                 |
| CB1370 / empty vector control | 28.5 | ± 1.25 | 60 |                     |                       |   |                         |   |                                        |

| Strain                        | mean | ± SEM  | n  | p-value<br>$\chi^2$ | N2<br>INDY/<br>CeNAC2 | / | TG38<br>INDY/<br>CeNAC2 | / | CB1370<br>/ empty<br>vector<br>control |
|-------------------------------|------|--------|----|---------------------|-----------------------|---|-------------------------|---|----------------------------------------|
| N2 / empty vector control     | 15.1 | ± 0.28 | 60 |                     | ≤0.001                |   |                         |   | ≤0.001                                 |
| N2 / INDY/CeNAC2              | 17.8 | ± 0.39 | 60 |                     |                       |   |                         |   | ≤0.001                                 |
| TG38 / empty vector control   | 15.1 | ± 0.26 | 60 |                     |                       |   | 0.131                   |   | ≤0.001                                 |
| TG38 / INDY/CeNAC2            | 17.8 | ± 0.29 | 60 |                     |                       |   |                         |   | ≤0.001                                 |
| CB1370 / empty vector control | 15.1 | ± 0.28 | 60 |                     |                       |   |                         |   |                                        |

| Strain                        | mean | ± SEM  | n  | p-value<br>$\chi^2$ | N2<br>INDY/<br>CeNAC2 | / | TG38<br>INDY/<br>CeNAC2 | / | CB1370<br>/ empty<br>vector<br>control |
|-------------------------------|------|--------|----|---------------------|-----------------------|---|-------------------------|---|----------------------------------------|
| N2 / empty vector control     | 14.1 | ± 0.27 | 60 |                     | 0.001                 |   |                         |   | ≤0.001                                 |
| N2 / INDY/CeNAC2              | 15.9 | ± 0.27 | 60 |                     |                       |   |                         |   | ≤0.001                                 |
| TG38 / empty vector control   | 15.1 | ± 0.46 | 60 |                     |                       |   | 0.597                   |   | ≤0.001                                 |
| TG38 / INDY/CeNAC2            | 14.8 | ± 0.42 | 60 |                     |                       |   |                         |   | ≤0.001                                 |
| CB1370 / empty vector control | 28.0 | ± 1.38 | 60 |                     |                       |   |                         |   |                                        |

Mean life span (±SEM) of worms fed with *E. coli* GC363 harboring the empty vector L4400 (empty vector control) versus *E. coli* GC363 harboring the INDY/CeNAC2 RNAi vector and CB1370 *daf-2(e1370)* fed with empty vector control. N2 wild type worms were used as control. Strain TG38 is short lived. Strain CB1370 served as long lived control. n = number of worms used in the experiment. Mean life span and SEM are in days. Experiments were performed four times with 15 worms per group (total 60).  $\chi^2$ -Test was performed using IMB SPSS Statistics 20.

**Table S2. Mean life spans when treated with deoxyglucose (DOG).**

| <b>Table S2d. Life-span No.1</b> |             |          |            |          |                            |                                              |                                               |
|----------------------------------|-------------|----------|------------|----------|----------------------------|----------------------------------------------|-----------------------------------------------|
| <b>Strain</b>                    | <b>mean</b> | <b>±</b> | <b>SEM</b> | <b>n</b> | <b>p-value</b><br>$\chi^2$ | <b>DOG-</b><br><b>INDY/</b><br><b>CeNAC2</b> | <b>/ DOG+</b><br><b>INDY</b><br><b>CeNAC2</b> |
| DOG - / empty vector control     | 9.9         | ±        | 0.44       | 60       |                            | 0.084                                        |                                               |
| DOG - / INDY/CeNAC2              | 11.8        | ±        | 0.57       | 60       |                            |                                              | 0.401                                         |
| DOG + / INDY/CeNAC2              | 11.6        | ±        | 0.51       | 60       |                            |                                              |                                               |
| DOG + / empty vector control     | 13.4        | ±        | 0.73       | 60       |                            |                                              | 0.211                                         |

| <b>Table S2e. Life-span No.2</b> |             |          |            |          |                            |                                              |                                               |
|----------------------------------|-------------|----------|------------|----------|----------------------------|----------------------------------------------|-----------------------------------------------|
| <b>Strain</b>                    | <b>mean</b> | <b>±</b> | <b>SEM</b> | <b>n</b> | <b>p-value</b><br>$\chi^2$ | <b>DOG-</b><br><b>INDY/</b><br><b>CeNAC2</b> | <b>/ DOG+</b><br><b>INDY</b><br><b>CeNAC2</b> |
| DOG - / empty vector control     | 10.3        | ±        | 0.47       | 60       |                            | 0.182                                        |                                               |
| DOG - / INDY/CeNAC2              | 12.2        | ±        | 0.62       | 60       |                            |                                              | 0.882                                         |
| DOG + / INDY/CeNAC2              | 11.7        | ±        | 0.50       | 60       |                            |                                              |                                               |
| DOG + / empty vector control     | 12.9        | ±        | 0.66       | 60       |                            |                                              | 0.297                                         |

| <b>Table S2f. Life-span No.3</b> |             |          |            |          |                            |                                              |                                               |
|----------------------------------|-------------|----------|------------|----------|----------------------------|----------------------------------------------|-----------------------------------------------|
| <b>Strain</b>                    | <b>mean</b> | <b>±</b> | <b>SEM</b> | <b>n</b> | <b>p-value</b><br>$\chi^2$ | <b>DOG-</b><br><b>INDY/</b><br><b>CeNAC2</b> | <b>/ DOG+</b><br><b>INDY</b><br><b>CeNAC2</b> |
| DOG - / empty vector control     | 10.3        | ±        | 0.48       | 60       |                            | 0.273                                        |                                               |
| DOG - / INDY/CeNAC2              | 12.7        | ±        | 0.66       | 60       |                            |                                              | 0.614                                         |
| DOG + / INDY/CeNAC2              | 11.6        | ±        | 0.47       | 60       |                            |                                              |                                               |
| DOG + / empty vector control     | 12.9        | ±        | 0.69       | 60       |                            |                                              | 0.027                                         |

Life span represents the mean of four independent experiments with 15 worms per group (total 60). Mean life span of worms in days ± SEM fed with *E.coli* GC363 harboring the empty vector L4400 (empty vector control) versus *E.coli* GC363 harboring INDY/CeNAC2- siRNA when treated with DOG. Mean life span and SEM are in days.

**Table S3. Mean, median and maximum life span data**

| <b>Table S3a. Life-span No.1</b> |                   |          |                     |                                |  |
|----------------------------------|-------------------|----------|---------------------|--------------------------------|--|
| <b>strain</b>                    | <b>mean ± SEM</b> | <b>n</b> | <b>median ± SEM</b> | <b>maximum life span ± SEM</b> |  |
| N2 / empty vector control        | 16,4 ± 0,28       | 60       | 17,0 ± 0,36         | 19,0 ± .                       |  |
| N2 / ceINDY                      | 17,2 ± 0,36       | 60       | 17,0 ± 0,58         | 21,0 ± .                       |  |
| TG38 / empty vector control      | 13,5 ± 0,26       | 60       | 14,0 ± 0,39         | 16,5 ± 0,67                    |  |
| TG38 / ceINDY                    | 14,2 ± 0,29       | 60       | 14,0 ± 0,38         | 17,5 ± 0,22                    |  |
| CB1370 / empty vector control    | 28,1 ± 1,32       | 60       | 31,0 ± 2,06         | 39,5 ± 0,50                    |  |

| <b>Table S3b. Life-span No.2</b> |                   |          |                     |                                |  |
|----------------------------------|-------------------|----------|---------------------|--------------------------------|--|
| <b>strain</b>                    | <b>mean ± SEM</b> | <b>n</b> | <b>median ± SEM</b> | <b>maximum life span ± SEM</b> |  |
| N2 / empty vector control        | 15,8 ± 0,29       | 60       | 16,0 ± 0,42         | 18,8 ± 0,17                    |  |
| N2 / ceINDY                      | 19,3 ± 0,52       | 60       | 20,0 ± 0,39         | 24,5 ± 0,22                    |  |
| TG38 / empty vector control      | 14,1 ± 0,21       | 60       | 14,0 ± 0,24         | 17,0 ± .                       |  |
| TG38 / ceINDY                    | 14,7 ± 0,26       | 60       | 15,0 ± 0,42         | 17,7 ± 0,21                    |  |
| CB1370 / empty vector control    | 28,5 ± 1,25       | 60       | 31,0 ± 2,03         | 39,3 ± 0,42                    |  |

| <b>Table S3c. Life-span No.3</b> |                   |          |                     |                                |  |
|----------------------------------|-------------------|----------|---------------------|--------------------------------|--|
| <b>strain</b>                    | <b>mean ± SEM</b> | <b>n</b> | <b>median ± SEM</b> | <b>maximum life span ± SEM</b> |  |
| N2 / empty vector control        | 15,1 ± 0,28       | 60       | 15,0 ± 0,51         | 18,3 ± 0,33                    |  |
| N2 / ceINDY                      | 17,8 ± 0,39       | 60       | 19,0 ± 0,49         | 21,3 ± 0,33                    |  |
| TG38 / empty vector control      | 15,1 ± 0,26       | 60       | 14,0 ± 0,39         | 17,5 ± 0,34                    |  |
| TG38 / ceINDY                    | 17,8 ± 0,29       | 60       | 14,0 ± 0,38         | 17,3 ± 0,33                    |  |
| CB1370 / empty vector control    | 28,0 ± 1,32       | 60       | 31,0 ± 2,14         | 39,7 ± 0,33                    |  |

| <b>Table S3d. Life-span No.4</b> |                   |          |                     |                                |  |
|----------------------------------|-------------------|----------|---------------------|--------------------------------|--|
| <b>strain</b>                    | <b>mean ± SEM</b> | <b>n</b> | <b>median ± SEM</b> | <b>maximum life span ± SEM</b> |  |
| N2 / empty vector control        | 14,1 ± 0,27       | 60       | 14,0 ± 0,24         | 17,7 ± 0,42                    |  |
| N2 / ceINDY                      | 15,9 ± 0,27       | 60       | 16,0 ± 0,48         | 18,8 ± 0,31                    |  |
| TG38 / empty vector control      | 15,1 ± 0,46       | 60       | 16,0 ± 0,79         | 19,3 ± 0,21                    |  |
| TG38 / ceINDY                    | 14,8 ± 0,42       | 60       | 15,0 ± 0,70         | 19,3 ± 0,33                    |  |
| CB1370 / empty vector control    | 28,0 ± 1,38       | 60       | 30,0 ± 2,54         | 39,7 ± 0,56                    |  |

Mean, median and maximum life span in days ± SEM of nematodes fed with *E.coli* GC363 harboring the empty vector L4400 (empty vector control) versus *E.coli* GC363 harboring INDY/CeNAC2 siRNA and CB1370 daf-2(e1370) fed with empty vector control. N2 wild type worms were used as control. Strain TG38 is short lived. Strain CB1370 served as long lived control. Experiments were performed four times with 15 worms per group (total 60).

**Table S4. Mean, median and maximum life span data**

| <b>Table S4a. Life-span No.1</b> |                   |          |                     |                                |  |
|----------------------------------|-------------------|----------|---------------------|--------------------------------|--|
| <b>strain</b>                    | <b>mean ± SEM</b> | <b>n</b> | <b>median ± SEM</b> | <b>maximum life span ± SEM</b> |  |
| DOG - / empty vector control     | 9,9 ± 0,44        | 60       | 9,0 ± 0,26          | 15,7 ± 0,61                    |  |
| DOG - / ceINDY                   | 11,8 ± 0,57       | 60       | 11,0 ± 0,55         | 18,0 ± 0,73                    |  |
| DOG + / ceINDY                   | 11,6 ± 0,51       | 60       | 11,0 ± 0,32         | 18,0 ± 0,45                    |  |
| DOG + / empty vector control     | 13,4 ± 0,73       | 60       | 14,0 ± 1,29         | 17,7 ± 0,56                    |  |

| <b>Table S4b. Life-span No.2</b> |                   |          |                     |                                |  |
|----------------------------------|-------------------|----------|---------------------|--------------------------------|--|
| <b>strain</b>                    | <b>mean ± SEM</b> | <b>n</b> | <b>median ± SEM</b> | <b>maximum life span ± SEM</b> |  |
| DOG - / empty vector control     | 10,3 ± 0,47       | 60       | 9,0 ± 0,29          | 15,7 ± 0,61                    |  |
| DOG - / ceINDY                   | 12,2 ± 0,62       | 60       | 11,0 ± 0,51         | 19,0 ± 0,37                    |  |
| DOG + / ceINDY                   | 11,7 ± 0,50       | 60       | 11,0 ± 0,36         | 17,8 ± 0,48                    |  |
| DOG + / empty vector control     | 12,9 ± 0,66       | 60       | 14,0 ± 1,42         | 17,2 ± 0,48                    |  |

| <b>Table S4c. Life-span No.3</b> |                   |          |                     |                                |  |
|----------------------------------|-------------------|----------|---------------------|--------------------------------|--|
| <b>strain</b>                    | <b>mean ± SEM</b> | <b>n</b> | <b>median ± SEM</b> | <b>maximum life span ± SEM</b> |  |
| DOG - / empty vector control     | 10,3 ± 0,48       | 60       | 9,0 ± 0,31          | 15,7 ± 0,61                    |  |
| DOG - / ceINDY                   | 12,7 ± 0,66       | 60       | 11,0 ± 0,63         | 18,7 ± 0,21                    |  |
| DOG + / ceINDY                   | 11,6 ± 0,47       | 60       | 11,0 ± 0,36         | 17,3 ± 0,33                    |  |
| DOG + / empty vector control     | 12,9 ± 0,69       | 60       | 14,0 ± 1,43         | 17,5 ± 0,56                    |  |

Mean, median and maximum life span in days ± SEM of nematodes fed with *E. coli* GC363 harboring the empty vector L4400 (empty vector control) versus *E. coli* GC363 harboring INDY/CeNAC2- siRNA when treated with DOG. Experiments were performed 4 times with 15 worms per group (total 60).

**Table S5. Percent median and maximum life span compared to controls**

|                                                                                                                                                                     | <b>% mean ± SEM</b> | <b>% median ± SEM</b> | <b>% max ± SEM</b> |
|---------------------------------------------------------------------------------------------------------------------------------------------------------------------|---------------------|-----------------------|--------------------|
| <b>N2 / empty vector control</b>                                                                                                                                    | 100                 | 100                   | 100                |
| <b>N2 / ceINDY</b>                                                                                                                                                  | 14,34 ± 3,65        | 16,49 ± 6,14          | 15,90 ± 5,14       |
| <b>TG38 / empty vector control</b>                                                                                                                                  | 100                 | 100                   | 100                |
| <b>TG38 / ceINDY</b>                                                                                                                                                | 8,32 ± 3,16         | 3,57 ± 2,06           | 2,26 ± 1,15        |
| Percent median and maximum life span compared to controls (±SEM) under DOG treatment, n=60. Maximum life span is the mean life span of the most long-lived 10%; n=6 |                     |                       |                    |

**Table S6 Percent median and maximum life span compared to controls**

|                                                                                                                                                                     | <b>% mean ± SEM</b> | <b>% median ± SEM</b> | <b>% max ± SEM</b> |
|---------------------------------------------------------------------------------------------------------------------------------------------------------------------|---------------------|-----------------------|--------------------|
| <b>DOG - / empty vector control</b>                                                                                                                                 | 100                 | 100                   | 100                |
| <b>DOG - / ceINDY</b>                                                                                                                                               | 20,12 ± 1,28        | 22,22 ± 0,00          | 18,44 ± 1,63       |
| <b>DOG + / empty vector control</b>                                                                                                                                 | 100                 | 100                   | 100                |
| <b>DOG + / ceINDY</b>                                                                                                                                               | -10,99 ± 1,06       | -21,43 ± 0,00         | 1,61 ± 1,22        |
| Percent median and maximum life span compared to controls (±SEM) under DOG treatment, n=60. Maximum life span is the mean life span of the most long-lived 10%; n=6 |                     |                       |                    |
